# Supplementary material for: Review article: Current approaches and critical issues in multi-risk recovery planning of urban areas exposed to natural hazards
Source: Copernicus journal article supplement (doi:10.5194/nhess-24-79-2024), 2024-01-17
Supplement: Supplementary file 1 [file nhess-24-79-2024-supplement.zip]

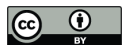

*Supplement of*

## **Review article: Current approaches and critical issues in multi-risk recovery planning of urban areas exposed to natural hazards**

**Soheil Mohammadi et al.**

*Correspondence to:* Soheil Mohammadi ([soheil.mohammadi@edu.unige.it](mailto:soheil.mohammadi@edu.unige.it))

- [nhess-24-79-2024-supplement-title-page.pdf](#)
- [Supplementary\\_Material\\_Mohammadi\\_et\\_al\\_2023\\_Revised.xlsx](#)

The copyright of individual parts of the supplement might differ from the article licence.
