# Supplementary material for: Review article: Current approaches and critical issues in multi-risk recovery planning of urban areas exposed to natural hazards
Source: Copernicus journal article supplement (doi:10.5194/nhess-24-79-2024), 2024-01-17
Supplement: Supplementary file 2 [file nhess-24-79-2024-supplement.zip]

Archive with 2 entries (2 files):
- nhess-24-79-2024-supplement-title-page.pdf
- Supplementary_Material_Mohammadi_et_al_2023_Revised.xlsm
