# Supplementary material for: Review article: Current approaches and critical issues in multi-risk recovery planning of urban areas exposed to natural hazards
Source: Copernicus journal article supplement (doi:10.5194/nhess-24-79-2024), 2024-01-17
Supplement: Supplementary file 2 [file nhess-24-79-2024-supplement.zip › Supplementary_Material_Mohammadi_et_al_2023_Revised.xlsm]

## Sheet: Content
	Review article: current approaches and critical issues in multi-risk recovery planning of urban areas exposed to natural hazards (Supplementary Material)
	Soheil Mohamadi (a)*, Silvia De Angeli (a), Giorgio Boni (a), Francesca Pirlone (a), Serena Cattari (a)
	(a) University of Genoa, Department of Civil, Chemical and Environmental Engineering, Via Montallegro 1, 16145, Genoa, Italy * Corresponding author: soheil.mohammadi@edu.unige.it (Soheil Mohammadi)
	Contents (click on hyperlinks)
	Tables - Extended versions
	Table S1	RECOVERY DEFINITIONS - Issue 1: Recovery and its role in the risk management cycle
	Table S2	POST DISASTER NEED ASSESSMENT - Issue 2: Recovery requirements in the current world setting
	Table S3	MULTI HAZARD RISK IN RECOVERY - Issue 2: Recovery requirements in the current world setting
	Table S4	OPTIMIZATION MODELS - Issue 3: Decision making models and methods for investment in physical elements to improve recovery in urban areas
	References

## Sheet: Recovery definitions 
	Table S1. Recovery definitions given by thirteen different sets of authors reported from the less to the most recent. Authors not highlighted in grey have been also reported in Table 1 of the manuscript, since they have been selcted as the most representative to explain the evolution of the "recovery" concept in time. Authors highlighted in grey are exclusively reported in this table, to provide …
	#	Author(s)	Definition
	1	Haas et al. (1977)	“Ordered, knowable, and predictable process” in which there is a strong community desire to “return to normalcy” following a disastrous event
	2	Rubin & Barbee (1985)	“Long-term recovery (i.e., the reconstruction process) is characterised by attention to rebuilding and new construction; restoration of major urban services; and review of pre-disaster land uses, especially insofar as they include consideration of local hazards in the recovery plans for the affected area.”
	3	Quarantelli (1989)	“Disaster recovery implies that everything works out fine after the disaster.”
	4	Nigg (1995)	“Recovery is a social process that begins prior to disaster impact and encompasses decision making concerning restoration.”
	5	Australia Institute for Disaster Resilience (1996)	“The coordinated process of supporting disaster-affected communities in reconstruction of the physical infrastructure and restoration of emotional, social, economic and physical well-being.”
	6	Mileti (1999)	“Process of interaction and decision-making among a variety of groups and institu­tions, including households, organisations, businesses, the broader community and society.”
	7	Sullivan (2003)	Recovery from disaster is an enabling and supportive process which allows individuals, families and communities to attain a proper level of functioning through the provision of information, specialist services and resources.
	8	Winkworth (2007)	“Recovery comes to signify an active process of integrating traumatic events associated with a disaster so that destructive impacts are minimised and so that individuals, communities and governments are able to move forward into a post-disaster future in which the world has changed.”
	9	Smith & Wenger (2007)	“The differential process of restoring, rebuilding, and reshaping the physical, social, economic, and natural environment through pre-event planning and post-event actions.”
	10	Carter (2008)	Recovery is the process by which communities and the nation assisted in returning to their proper level of functioning following a disaster.
	11	Schwab et al. (2014)	Recovery includes restoring housing, transportation, and public services; restarting economic activity; and fostering long-term community redevelopment and improvements
	12	Smith et al. (2018)	“The differential process of restoring, rebuilding, and reshaping the physical, social, economic, and natural environment through pre-event planning and post-event actions that enhance the resilience and adaptive capacity of assistance networks to effectively address recovery needs that span rapid and slow-onset hazards and disasters.”
	13	UNDRR (2020)	“The restoring or improving of livelihoods and health, as well as economic, physical, social, cultural, and environmental assets, systems and activities, of a disaster-affected community or society, aligning with the principles of sustainable development and ‘build back better’, to avoid or reduce future disaster risk.”

## Sheet: Post disaster need assessment 
	Table S2. Post disaster need assessment approaches. Authors not highlighted in grey have been also reported in Table 2 of the manuscript. Authors highlighted in grey are exclusively reported in this table, to provide additional post disaster need assessment studies available in the literature.
	#	Author(s)	Assessment target/ Main goal	Method	Input data / considered factors	Hazard(s)	Main priorities amongst the needs	Involved stakeholders
	1	Malilay et al. (1996)	Quantification of remained population, including the number of people with specific health needs	Quantitative cluster-sampling	- Preliminary disaster damage assessment	Not specified	None	None
					- Housing units
	2	Chen et al. (2016)	- Community needs	Quantitative cluster-sampling	- Population data	Earthquake	- Drinking water	None
			- Morbidity and mortality surveillance		- Infrastructure residual functionality		- Public transportation
	3	He (2018)	Community needs	Semi-structured interviews and focus groups	- Disaster impacts	Earthquake	- Productive living and development issues	Earthquake-resettled households and community leaders
					- Disaster public perception		- Permanent ownership of land
					- Local capacity		- Gain of employability for overseas job-hunting
					- Expected external aids
	4	He (2019)	Community needs	Semi-structured interviews and focus groups	- Disaster public perception	Earthquake	- Safe land for reconstruction	Earthquake-resettled households and community leaders
							- Constructive conversation with the government
					- Expected external aids		- Permanent housing
							- Land grants
	5	He et al (2019)	Evaluation of the current living conditions (compared to the pre-disaster)	- Semi-structured interviews and focus groups	- Physical living conditions	Earthquake	Non-agricultural employment	Households
					- Off-farm job availability
				- Documentary and field investigations	- Living expenses
					- Place attachment
					- Expected external aids
	6	Kurosaki (2017)	Assessment of the level of household recovery	Panel survey	-Preliminary disaster damage assessment	Flood	Productive assets functionality	Households
					-External aids received
					-Changes in the productive assets
	7	Honjo (2011)	Life recovery assessment	Workshops	Citizens’ happiness	Earthquake	Permanent housing	Citizens
	8	Andrews & Caron (2016)	Vulnerable populations (Low, moderate and middle Income households, Renters / Tenants, Squatters and Migrants)	Litreature and existing frameworks review	The ‘production’ of vulnerable groups	Tsunami, Storm, Earthquake	- Land tenure and housing	None
							- Employment
							- Socio-economic livelihood
	9	Rouhanizadeh et al. (2020)	Barriers to effective post-disaster recovery	Litreature review	Frequency of being referred in the studied literature	Hurricanes	- Infrastructure and housing	None
							- Employment
							- Small businesses activation
	10	Phillips (1993	Earthquake effect on low income and miniority population	- In depth interview	Living in safe area	Earthquake	Permanent housing	- Organizations representing disaster recovery
				- Observation at public relief meetings				- Organizations representing housing recovery
				-Documentary and field investigations				- Local federal disaster reliefe reperentatives
								- Special population
	11	Finucane et al. (2020)	Inclusiveness of community recovery	- Identify Case Examples from Past Disasters	- Balance short- and long-term societal needs	Tsunamis and hurricanes	- Protecting and securing access to environmental source of food and income	None
				- Organize Case Examples by Interacting Components of Vulnerability and Inequity	- Vulnarability and inequality
							- Education
	12	Kailes & Enders, (2007)	Needs of people with disabilities, people with serious mental illness, minority groups, non–English speakers, children, and the elderly	Explore a framework	Identifying and addressing functional needs through the recognition of the special needy population	Hurricanes	- Medical Needs	None
							- Transportation Needs
	13	Deen (2015)	- Vulnerable households and undermined informal coping strategies	- Interviews	- Reducing vulnerability	Flood	- Public health services	Key government officials
							- Sustainable shelter
							- Restoration of on and off-farm incomes (agriculture and livestock)
			- Government's capacity	- Review and analysis of the existing literature and documents	- Sustainable development goals (SDGs)		- Public administration
							- Infrastructures
							- Education services
	14	Bolin & Stanford (1998)	Examining the activities of community-based organisations and NGOs in assisting vulnerable people with unmet post-disaster needs	Interviews	- Longer-term issues of community development	Earthquake	Affordable housing fo low income community, particularly ethnic groups	Disaster area people
					- Unmet needs relate to thevulnerability of particular class and ethnic groups.
	15	Mutch (2014)	Role of schools in community disaster initiatives and in children and young people’s psycho-social well-being in disaster contexts	Selected literature review	Physical and social effects of schools in disaster community	Storms, floods, wildfires, earthquakes and Tsinamies	School	None
	16	Eid & El-adaway (2018)	Disaster recovery strategies in residential housing and economic financial recovery as well as the infrastructure development	Decision-making framework developed based on bottom-up multiagent-based model	- Balances the short-term redevelopment objectives and the long-term goals of reducing the host community three-dimensional vulnerability (i.e., social, economic, and environmental).	Hurricanes	None	None
					- Meets the needs of the broad community stakeholders
	17	Stough et al. (2016)	Long-term impacts of a disaster on individuals with disabilities	Focus groups	Bariers of the recovery	Hurricanes	- Housing	Individuals with disabilities live in disaster area
							- Transportation
							- Employment
							- Physical and mental health

## Sheet: Multi-hazard in recovery
	Table S4. Multi-hazard risk approaches in recovery or resiliency analysis. Authors not highlighted in grey have been also reported in Table 2 of the manuscript. Authors highlighted in grey are exclusively reported in this table, to provide additional multi-hazard recovery approaches available in the literature.
	#	Author(s)	Considered hazards	Included territorial element(s)	Spatial scale	Aim of the research	Multi-hazard approach
	1	Ouyang et al. (2012)	-Random hazards (i.e., any kind of spatially limited accidental hazard)	Power transmission grid	Country	A multi-stage framework to analyse infrastructure resilience	Multiple hazards are considered in a separate way (i.e. without considering any interaction) and compared.
			-Hurricanes
	2	Der Sarkissian et al. (2020)	-Earthquakes	Road network	Country	Assess road network resilience to natural hazards.	Multiple hazards are considered in a separate way (i.e., without considering any interaction) and compared.
			-Floods
			-Wildfires
			-Landslides
			-Windstorms
	3	Bozza et al. (2017)	-Landslides	Hybrid social-physical networks	City district	Assess resilience by applying synthetic indices.	Multiple hazards are considered in a separate way (i.e., without considering any interaction) and compared.
			-Earthquakes
	4	Ghannad et al. (2020)	-Earthquakes	Physical structures	Regional (US State)	Post Disaster recovery process prioritisation model	Multiple hazards are considered in a separate way (i.e., without considering any interaction)
			-Floods
			-Hurricanes
	5	Gentile et al. (2019)	-Earthquakes	Schools	City	Prioritisation for DRR measures	The considered hazards are combined in a multi-hazard index
			-Tsunamis
	6	Sevieri et al. (2020)	-Earthquakes	Cultural heritage assets	City	Prioritisation for DRR measures	The considered hazards are combined in a multi-hazard index
			-Windstorms
	7	Argyroudis et al. (2020)	-Floods	Multi-span highway bridge	Single asset/ Structure	Life-cycle assessment of the resilience of infrastructure, by taking into account all the possible events that may affect the system during its design lifetime.	Physical vulnerability surface that includes both hazards and accumulated damage due to the occurrence of the second hazard before complete recovery from the first one.
			-Earthquakes
	8	Cheng et al. (2021)	- Earthquakes	IEEE 9-bus as an abstract and approximation of country power grid system	Country	Quantifying the resilience of engineered systems under random multi-hazard by employing availability as an effective performance indicator and assessing the system's availability across time, based on which resilience is quantified w.r.t. system robustness and recovery ability.	Interdependent hazards are considered and their interdependences characterized by the copula, joint distribution, and Markov models. Cascading failures have taken into account.
			- Heavy wind
			- Cyber-attacks
	9	Di Ludovico & Di Lodovico (2020)	- Landslides	- Residential buildings	Regional (Italian Province)	Structuring an assessment-oriented risk knowledge System determination of multi-risk scenarios and the definition of prevention and territorial recovery projects in hot spot areas.	Multiple hazards are considered in a separate way (i.e., without considering any interaction)
			- Floods	- Industrial buildings
			- Avalanches	- Religious buildings
			- Earthquakes	- Public buildings
			- Wildfires

## Sheet: Optimization models 
	Table S4. Optimization models for recovery planning. This table reports in a table-format the information provided by Table 4 of the manuscript. Additional authors not reported in Table 4 are highlighted in grey.
	#	Author(s)	Objective	Urban elements	Interdependecies consideration	Pre-, Post-, or pre & Post disaster action
	1	Wu et al. (2022)	Max service, Min time	Transportation network	No	Post
	2	Saadat et al. (2020)	Min cost	Transportation network	No	Pre & Post
	3	Xu et al. (2007)	Max service, Min time	Electricity network	No	Post
	4	Bocchini & Frangopol (2012a)	Max service, Min cost	Transportation network	No	Post
	5	Hackl et al. (2018)	Min cost	Transportation network	No	Post
	6	Bocchini & Frangopol (2012b)	Min cost, Min time	Transportation network	No	Post
	7	Karamlou et al. (2016)	Max service, Min cost	Transportation network	No	Pre & Post
	8	Sarkale et al. (2018)	Max service, Min time	Water network	No	Post
	9	Orabi et al. (2010)	Min cost, Min time	Transportation network	No	Post
	10	Y. Fang & Zio (2019)	Min cost, Min time	Electricity network	Yes	Pre
				Gas Network
	11	Der Sarkissian et al. (2020)	Max service	Transportation network	No	Pre
	12	Du & Peeta (2014)	Max service	Transportation network	No	Pre
	13	Rosato et al. (2021)	Max service	Water network	Yes	Pre
				Electricity network
				Gas Network
				Urban facility Buildings
				Telecommunication network
	14	Soltani-Sobh et al. (2016)	Min cost, Min time	Transportation network	No	Pre
	15	Bozza, Asprone, & Manfredi (2017)	Max service	Urban facility Buildings	Yes	Pre
	16	Y.-P. Fang & Zio (2019)	Min cost, Min time	Electricity network	Yes	Pre
				Gas Network
	17	Ghorbani-Renani et al. (2020)	Max service, Min time	Water network	Yes	Pre & Post
				Electricity network
				Gas Network
	18	X. Liu et al. (2021)	Min cost, Min time	Electricity network	Yes	Pre & Post
				Gas Network
	19	Ouyang et al. (2012)	Min time	Electricity network	No	Pre & Post
	20	Ouyang et al. (2019)	Min cost	Electricity network	No	Pre & Post
	21	Blagojević et al. (2022)	Max service, Min time	Electricity network	Yes	Pre & Post
				Water network
				Telecommunication network
				Urban facility Buildings
	22	Almoghathawi & Barker (2019)	Max service, Min time	Electricity network	Yes	Pre & Post
				Water network
	23	W. Liu et al. (2020)	Max service	Water network	No	Post
	24	Der Sarkissian et al. (2022)	Max service	Electricity network	Yes	Post
				Water network
				Transportation network
				Telecommunication network
	25	Rosenheim et al. (2021)	Max service	Water network	No	Post
	26	Cha & He (2019)	Max service	Water network	Yes	Post
				Electricity network
	27	Y.-P. Fang et al. (2016)	Max service, Min time	Electricity network	No	Post
	28	Mudassir (2020)	Max service	Urban facility Buildings	Yes	Post
	29	Almoghathawi et al. (2021)	Min cost, Min time	Electricity network	Yes	Post
				Water network
	30	Ghannad et al. (2020)	Max service, Min cost	Water network	No	Post
				Electricity network
				Urban facility Buildings
				Gas Network
				Telecommunication network
				Good production
	31	Mudassir & Di Marco (2021)	Max service	Transportation network	Yes	Post
				Urban facility Buildings
	32	Bristow (2019)	Max service, Min time	Electricity network	Yes	Post
				Water network
				Gas Network
				Transportation network
	33	Guidotti et al. (2019)	Max service	Water network	Yes	Post
	34	Cavallaro et al. (2014)	Max service, Min time	Transportation network	Yes	Post
				Good production
				Urban facility Buildings
	35	Xu et al. (2020)	Max service, Min time	Transportation network	No	Post
	36	Yu & Baroud (2020)	Min time	Water network	Yes	Post
				Electricity network

## Sheet: References
	References
	#	Full reference
	1	Almoghathawi, Y., & Barker, K. (2019). Component importance measures for interdependent infrastructure network resilience. Computers & Industrial Engineering, 133, 153–164. https://doi.org/10.1016/j.cie.2019.05.001
	2	Almoghathawi, Y., González, A. D., & Barker, K. (2021). Exploring Recovery Strategies for Optimal InterdependentInfrastructure Network Resilience. Networks and Spatial Economics, 21(1), 229–260. https://doi.org/10.1007/s11067-020-09515-4
	3	Andrews, C., & Caron, C. (2016). Long Term Disaster Recovery Planning in Urban Centers: The Role of Land Tenure and Housing in Reducing Vulnerability.
	4	Australian Institute for Disaster Resilience: Australian Emergency Management Thesaurus, Tech. rep., Australian Institute for Disaster Resilience, https://knowledge.aidr.org.au/media/1957/manual-4-australian-emergency-management-thesaurus.pdf, (online, accessed 24 Oct 2023), 1998.
	5	Argyroudis, S. A., Mitoulis, S. A., Hofer, L., Zanini, M. A., Tubaldi, E., & Frangopol, D. M. (2020). Resilience assessment framework for critical infrastructure in a multi-hazard environment: Case study on transport assets. Science of The Total Environment, 714, 136854. https://doi.org/10.1016/j.scitotenv.2020.136854
	6	Blagojević, N., Didier, M., & Stojadinović, B. (2022). Quantifying component importance for disaster resilience of communities with interdependent civil infrastructure systems. Reliability Engineering & System Safety, 228, 108747. https://doi.org/10.1016/j.ress.2022.108747
	7	Bocchini, P., & Frangopol, D. M. (2012a). Optimal Resilience- and Cost-Based Postdisaster Intervention Prioritization for Bridges along a Highway Segment. Journal of Bridge Engineering, 17(1), 117–129. https://doi.org/10.1061/(ASCE)BE.1943-5592.0000201
	8	Bocchini, P., & Frangopol, D. M. (2012b). Restoration of Bridge Networks after an Earthquake: Multicriteria Intervention Optimization. Earthquake Spectra, 28(2), 427–455. https://doi.org/10.1193/1.4000019
	9	Bolin, R., & Stanford, L. (1998). The Northridge Earthquake: Community-based Approaches to Unmet Recovery Needs. Disasters, 22(1), 21–38. https://doi.org/10.1111/1467-7717.00073
	10	Bozza, A., Asprone, D., & Manfredi, G. (2017). A methodological framework assessing disaster resilience of city ecosystems to enhance resource use efficiency. International Journal of Urban Sustainable Development, 9(2), 136–150. https://doi.org/10.1080/19463138.2016.1244538
	11	Bozza, A., Asprone, D., Parisi, F., & Manfredi, G. (2017). Alternative Resilience Indices for City Ecosystems Subjected to Natural Hazards. Computer-Aided Civil and Infrastructure Engineering, 32(7), 527–545. https://doi.org/10.1111/mice.12275
	12	Bristow, D. N. (2019). How Spatial and Functional Dependencies between Operations and Infrastructure Leads to Resilient Recovery. Journal of Infrastructure Systems, 25(2), 04019011. https://doi.org/10.1061/(ASCE)IS.1943-555X.0000490
	13	Carter, W. N. (2008). Disaster management: A disaster manager’s handbook.
	14	Cavallaro, M., Asprone, D., Latora, V., Manfredi, G., & Nicosia, V. (2014). Assessment of Urban Ecosystem Resilience through Hybrid Social–Physical Complex Networks. Computer-Aided Civil and Infrastructure Engineering, 29(8), 608–625. https://doi.org/10.1111/mice.12080
	15	Cha, E. J., & He, X. (2019, May 26). Post-disaster Recovery Planning of Interdependent Infrastructure Systems: A Game Theory-Based Approach. https://doi.org/10.22725/ICASP13.091
	16	Chen, K.-T., Chen, W. J., Malilay, J., & Twu, S.-J. (2016). The public health response to the Chi-Chi earthquake in Taiwan, 1999. Public Health Reports.
	17	Cheng, Y., Elsayed, E. A., & Chen, X. (2021). Random Multi Hazard Resilience Modeling of Engineered Systems and Critical Infrastructure. Reliability Engineering & System Safety, 209, 107453. https://doi.org/10.1016/j.ress.2021.107453
	18	Deen, S. (2015). Pakistan 2010 floods. Policy gaps in disaster preparedness and response. International Journal of Disaster Risk Reduction, 12, 341–349. https://doi.org/10.1016/j.ijdrr.2015.03.007
	19	Der Sarkissian, R., Abdallah, C., Zaninetti, J.-M., & Najem, S. (2020). Modelling intra-dependencies to assess road network resilience to natural hazards. Natural Hazards, 103(1), 121–137. https://doi.org/10.1007/s11069-020-03962-5
	20	Der Sarkissian, R., Cariolet, J.-M., Diab, Y., & Vuillet, M. (2022). Investigating the importance of critical infrastructures’ interdependencies during recovery; lessons from Hurricane Irma in Saint-Martin’s island. International Journal of Disaster Risk Reduction, 67, 102675. https://doi.org/10.1016/j.ijdrr.2021.102675
	21	Di Ludovico, D., & Di Lodovico, L. (2020). The Regional Management Risk Plan. Knowledge, scenarios and prevention projects in a regional context. International Journal of Disaster Risk Reduction, 45, 101465. https://doi.org/10.1016/j.ijdrr.2019.101465
	22	Du, L., & Peeta, S. (2014). A Stochastic Optimization Model to Reduce Expected Post-Disaster Response Time Through Pre-Disaster Investment Decisions. Networks and Spatial Economics, 14(2), 271–295. https://doi.org/10.1007/s11067-013-9219-1
	23	Eid, M. S., & El-adaway, I. H. (2018). Decision-Making Framework for Holistic Sustainable Disaster Recovery: Agent-Based Approach for Decreasing Vulnerabilities of the Associated Communities. Journal of Infrastructure Systems, 24(3), 04018009. https://doi.org/10.1061/(ASCE)IS.1943-555X.0000427
	24	Fang, Y., & Zio, E. (2019). Game-Theoretic Decision Making for the Resilience of Interdependent Infrastructures Exposed to Disruptions. In D. Gritzalis, M. Theocharidou, & G. Stergiopoulos (Eds.), Critical Infrastructure Security and Resilience: Theories, Methods, Tools and Technologies (pp. 97–114). Springer International Publishing. https://doi.org/10.1007/978-3-030-00024-0_6
	25	Fang, Y.-P., Pedroni, N., & Zio, E. (2016). Resilience-Based Component Importance Measures for Critical Infrastructure Network Systems. IEEE Transactions on Reliability, 65(2), 502–512. https://doi.org/10.1109/TR.2016.2521761
	26	Fang, Y.-P., & Zio, E. (2019). An adaptive robust framework for the optimization of the resilience of interdependent infrastructures under natural hazards. European Journal of Operational Research, 276(3), 1119–1136. https://doi.org/10.1016/j.ejor.2019.01.052
	27	Finucane, M. L., Acosta, J., Wicker, A., & Whipkey, K. (2020). Short-Term Solutions to a Long-Term Challenge: Rethinking Disaster Recovery Planning to Reduce Vulnerabilities and Inequities. International Journal of Environmental Research and Public Health, 17(2), Article 2. https://doi.org/10.3390/ijerph17020482
	28	Gentile, R., Galasso, C., Idris, Y., Rusydy, I., & Meilianda, E. (2019). From rapid visual survey to multi-hazard risk prioritisation and numerical fragility of school buildings. Natural Hazards and Earth System Sciences, 19(7), 1365–1386. https://doi.org/10.5194/nhess-19-1365-2019
	29	Ghannad, P., Lee, Y.-C., Friedland, C. J., Choi, J. O., & Yang, E. (2020). Multiobjective Optimization of Postdisaster Reconstruction Processes for Ensuring Long-Term Socioeconomic Benefits. Journal of Management in Engineering, 36(4), 04020038. https://doi.org/10.1061/(ASCE)ME.1943-5479.0000799
	30	Ghorbani-Renani, N., González, A. D., Barker, K., & Morshedlou, N. (2020). Protection-interdiction-restoration: Tri-level optimization for enhancing interdependent network resilience. Reliability Engineering & System Safety, 199, 106907. https://doi.org/10.1016/j.ress.2020.106907
	31	Guidotti, R., Gardoni, P., & Rosenheim, N. (2019). Integration of physical infrastructure and social systems in communities’ reliability and resilience analysis. Reliability Engineering & System Safety, 185, 476–492. https://doi.org/10.1016/j.ress.2019.01.008
	32	Haas, J. E., Kates, R. W., & Bowden, M. J. (1977). Reconstruction following disaster. In Reconstruction following disaster. US The Massachusetts Institute of Technology.
	33	Hackl, J., Adey, B. T., & Lethanh, N. (2018). Determination of Near-Optimal Restoration Programs for Transportation Networks Following Natural Hazard Events Using Simulated Annealing. Computer-Aided Civil and Infrastructure Engineering, 33(8), 618–637. https://doi.org/10.1111/mice.12346
	34	He, L. (2018). We need land first. https://doi.org/10.35188/UNU-WIDER/2018/504-6
	35	He, L. (2019). Identifying local needs for post-disaster recovery in Nepal. World Development, 118, 52–62. https://doi.org/10.1016/j.worlddev.2019.02.005
	36	He, L., Aitchison, J. C., Hussey, K., & Chen, Y. (2019). Building new houses or long-term recovery? A combination of quantitative and qualitative evidence from earthquake-displaced households in Sichuan, China. Habitat International, 83, 135–145. https://doi.org/10.1016/j.habitatint.2018.12.002
	37	Honjo, Y. (2011). Implementation of the Kobe City Recovery Plan. Japan Social Innovation Journal, 1(1), 1–1.
	38	Kailes, J. I., & Enders, A. (2007). Moving Beyond “Special Needs”: A Function-Based Framework for Emergency Management and Planning. Journal of Disability Policy Studies, 17(4), 230–237. https://doi.org/10.1177/10442073070170040601
	39	Karamlou, A., Bocchini, P., & Christou, V. (2016). Metrics and algorithm for optimal retrofit strategy of resilient transportation networks. In Maintenance, Monitoring, Safety, Risk and Resilience of Bridges and Bridge Networks. CRC Press.
	40	Kurosaki, T. (2017). Household-Level Recovery after Floods in a Tribal and Conflict-Ridden Society. World Development, 94, 51–63. https://doi.org/10.1016/j.worlddev.2016.12.039
	41	Liu, W., Song, Z., Ouyang, M., & Li, J. (2020). Recovery-based seismic resilience enhancement strategies of water distribution networks. Reliability Engineering & System Safety, 203, 107088. https://doi.org/10.1016/j.ress.2020.107088
	42	Liu, X., Fang, Y.-P., & Zio, E. (2021). A Hierarchical Resilience Enhancement Framework for Interdependent Critical Infrastructures. Reliability Engineering & System Safety, 215, 107868. https://doi.org/10.1016/j.ress.2021.107868
	43	Malilay, J., Flanders, W. D., & Brogan, D. (1996). A modified cluster-sampling method for post-disaster rapid assessment of needs. Bulletin of the World Health Organization, 74(4), 399.
	44	Mileti, D. (1999). Disasters by Design: A Reassessment of Natural Hazards in the United States. https://doi.org/10.17226/5782
	45	Mudassir, G. (2020). Social-Based Physical Reconstruction Planning in Case of Natural Disaster: A Machine Learning Approach. In F. Dalpiaz, J. Zdravkovic, & P. Loucopoulos (Eds.), Research Challenges in Information Science (pp. 604–612). Springer International Publishing. https://doi.org/10.1007/978-3-030-50316-1_44
	46	Mudassir, G., & Di Marco, A. (2021). Social-based City Reconstruction Planning in case of natural disasters: A Reinforcement Learning Approach. 2021 IEEE 45th Annual Computers, Software, and Applications Conference (COMPSAC), 493–503. https://doi.org/10.1109/COMPSAC51774.2021.00074
	47	Mutch, C. (2014). The role of schools in disaster preparedness, response and recovery: What can we learn from the literature? Pastoral Care in Education, 32(1), 5–22. https://doi.org/10.1080/02643944.2014.880123
	48	Nigg, J. M. (1995b). Disaster Recovery as a Social Process. https://udspace.udel.edu/handle/19716/625
	49	Orabi, W., Senouci, A. B., El-Rayes, K., & Al-Derham, H. (2010). Optimizing Resource Utilization during the Recovery of Civil Infrastructure Systems. Journal of Management in Engineering, 26(4), 237–246. https://doi.org/10.1061/(ASCE)ME.1943-5479.0000024
	50	Ouyang, M., Dueñas-Osorio, L., & Min, X. (2012). A three-stage resilience analysis framework for urban infrastructure systems. Structural Safety, 36–37, 23–31. https://doi.org/10.1016/j.strusafe.2011.12.004
	51	Ouyang, M., Liu, C., & Xu, M. (2019). Value of resilience-based solutions on critical infrastructure protection: Comparing with robustness-based solutions. Reliability Engineering & System Safety, 190, 106506. https://doi.org/10.1016/j.ress.2019.106506
	52	Phillips, B. D. (1993). Cultural Diversity in Disasters: Sheltering, Housing, and Long Term Recovery. International Journal of Mass Emergencies & Disasters, 11(1), 99–110. https://doi.org/10.1177/028072709301100108
	53	Quarantelli, E. L. (1989). Disaster Recovery: Comments On The Literature And A Mostly Annotated Bibliography*. https://udspace.udel.edu/handle/19716/1331
	54	Rosato, V., Pietro, A., Kotzanikolaou, P., Stergiopoulos, G., & Smedile, G. (2021). Integrating Resilience in Time-based Dependency Analysis: A Large-Scale Case Study for Urban Critical Infrastructures. https://doi.org/10.5772/intechopen.97809
	55	Rosenheim, N., Guidotti, R., Gardoni, P., & Peacock, W. G. (2021). Integration of detailed household and housing unit characteristic data with critical infrastructure for post-hazard resilience modeling. Sustainable and Resilient Infrastructure, 6(6), 385–401. https://doi.org/10.1080/23789689.2019.1681821
	56	Rouhanizadeh, B., Kermanshachi, S., & Nipa, T. J. (2020). Exploratory analysis of barriers to effective post-disaster recovery. International Journal of Disaster Risk Reduction, 50, 101735. https://doi.org/10.1016/j.ijdrr.2020.101735
	57	Rubin, C. B., & Barbee, D. G. (1985). Disaster Recovery and Hazard Mitigation: Bridging the Intergovernmental Gap. Public Administration Review, 45, 57–63. https://doi.org/10.2307/3134998
	58	Saadat, Y., Ayyub, B. M., Zhang, Y., Zhang, D., & Huang, H. (2020). Resilience-Based Strategies for Topology Enhancement and Recovery of Metrorail Transit Networks. ASCE-ASME Journal of Risk and Uncertainty in Engineering Systems, Part A: Civil Engineering, 6(2), 04020017. https://doi.org/10.1061/AJRUA6.0001057
	59	Sarkale, Y., Nozhati, S., P. Chong, E. K., Ellingwood, B. R., & Mahmoud, H. (2018). Solving Markov decision processes for network-level post-hazard recovery via simulation optimization and rollout. 2018 IEEE 14th International Conference on Automation Science and Engineering (CASE), 906–912. https://doi.org/10.1109/COASE.2018.8560473
	60	Schwab, J., Topping, K. C., Eadie, C., Deyle, R. E., & Smith, R. A. (2014). Planning for Post-disaster Recovery. PAS Rep. No. 576.
	61	Sevieri, G., Galasso, C., D’Ayala, D., De Jesus, R., Oreta, A., Grio, M. E. D. A., & Ibabao, R. (2020). A multi-hazard risk prioritisation framework for cultural heritage assets. Natural Hazards and Earth System Sciences, 20(5), 1391–1414. https://doi.org/10.5194/nhess-20-1391-2020
	62	Smith, G., Martin, A., & Wenger, D. E. (2018). Disaster Recovery in an Era of Climate Change: The Unrealized Promise of Institutional Resilience. In H. Rodríguez, W. Donner, & J. E. Trainor (Eds.), Handbook of Disaster Research (pp. 595–619). Springer International Publishing. https://doi.org/10.1007/978-3-319-63254-4_28
	63	Smith, G. P., & Wenger, D. (2007). Sustainable Disaster Recovery: Operationalizing An Existing Agenda. In H. Rodríguez, E. L. Quarantelli, & R. R. Dynes (Eds.), Handbook of Disaster Research (pp. 234–257). Springer. https://doi.org/10.1007/978-0-387-32353-4_14
	64	Soltani-Sobh, A., Heaslip, K., Scarlatos, P., & Kaisar, E. (2016). Reliability based pre-positioning of recovery centers for resilient transportation infrastructure. International Journal of Disaster Risk Reduction, 19, 324–333. https://doi.org/10.1016/j.ijdrr.2016.09.004
	65	Stough, L. M., Sharp, A. N., Resch, J. A., Decker, C., & Wilker, N. (2016). Barriers to the long-term recovery of individuals with disabilities following a disaster. Disasters, 40(3), 387–410. https://doi.org/10.1111/disa.12161
	66	Sullivan, M. (2003). Integrated recovery management: A new way of looking at a delicate process. Australian Journal of Emergency Management, The, 18(2), 4–27.
	67	UNDRR. (2020). Terminology. United Nations Office for Disaster Risk Reduction Geneva, Switzerland.
	68	Winkworth, G. (2007). Disaster recovery: A review of the literature [Report]. Australian Catholic University. https://doi.org/10/Winkworth_2007_Disaster_Recovery_Literature_Review.pdf
	69	Wu, F., Schonfeld, P. M., Ayyub, B., & Kim, M. (2022). Topological Approach for Optimizing Railroad Freight Network Restoration after Disruptions. Transportation Research Record, 2676(12), 750–759. https://doi.org/10.1177/03611981221097397
	70	Xu, N., Guikema, S. D., Davidson, R. A., Nozick, L. K., Çağnan, Z., & Vaziri, K. (2007). Optimizing scheduling of post-earthquake electric power restoration tasks. Earthquake Engineering & Structural Dynamics, 36(2), 265–284. https://doi.org/10.1002/eqe.623
	71	Xu, Z., Ramirez-Marquez, J. E., Liu, Y., & Xiahou, T. (2020). A new resilience-based component importance measure for multi-state networks. Reliability Engineering & System Safety, 193, 106591. https://doi.org/10.1016/j.ress.2019.106591
	72	Yu, J.-Z., & Baroud, H. (2020). Modeling Uncertain and Dynamic Interdependencies of Infrastructure Systems Using Stochastic Block Models. ASCE-ASME J Risk and Uncert in Engrg Sys Part B Mech Engrg, 6(2). https://doi.org/10.1115/1.4046472
